# Supplementary material for: Astragaloside IV Blunts Epithelial–Mesenchymal Transition and G2/M Arrest to Alleviate Renal Fibrosis via Regulating ALDH2-Mediated Autophagy
Source: MDPI journal article supplement (doi:10.3390/cells12131777), 2023-07-04
Supplement: s1 [file s1]

## Supplementary Materials for

### Astragaloside IV blunts epithelial-mesenchymal transition and G2/M arrest to alleviate renal fibrosis *via* regulating ALDH2-mediated autophagy

Table s1. Primers used in RT-qPCR Analysis.

| Gene        | Forward primer (5'→3')   | Reverse primer (5'→3') |
|-------------|--------------------------|------------------------|
| RN-Fn1      | AAACCGGGAAGAGCAAGAG      | CCGTTCCCACTGCTGATTTA   |
| RN-Vim      | CCATCAACACCGAGTTCAAGA    | CGCACCTTGTCGATGTAGTT   |
| RN-Acta2    | AGGGAGTGATGTTTGAATG      | GGTGATGATGCCGTGTTCTA   |
| RN-Tp53     | ACATGACTGAGGTCGTGAGA     | GATTTCTTCCACCCGGATAAG  |
| RN-Cdkn1a   | AGTATGCCGTCGTCTGTTC      | TCTCAGTGGCGAAGTCAAAG   |
| RN-Aldh2    | CTTCATTAACAATGAGTGGCATGA | CTTGTTCCCTTCGGCTACC    |
| RN-Mtor     | CAGACGCCAATGAGAGGAAG     | AGGAGGTTCCGAAGGTAGTT   |
| RN-Map1lc3b | CCACCAAGATCCCAGTGATTAT   | TTCACGTGATCAGGTACAAGG  |
| RN-Becn1    | CAGGAACTCACAGCTCCATTAC   | CCATCCTGGCGAGTTTCAATA  |
| RN-Atg7     | CACGAACTGACCCAGAAGAA     | GGCAGAGTCACCATTGTAGTAA |
| RN-Gapdh    | GACATGCCGCCTGGAGAAAC     | AGCCCAGGATGCCCTTTAGT   |
| HS-ALDH2    | GGACATGGTCCTCAAATGTCTC   | CGTGTGTAGCTGAAGAAGTCTC |
| HS-GAPDH    | CAGGAGGCATTGCTGATGAT     | GAAGGCTGGGGCTCATTT     |

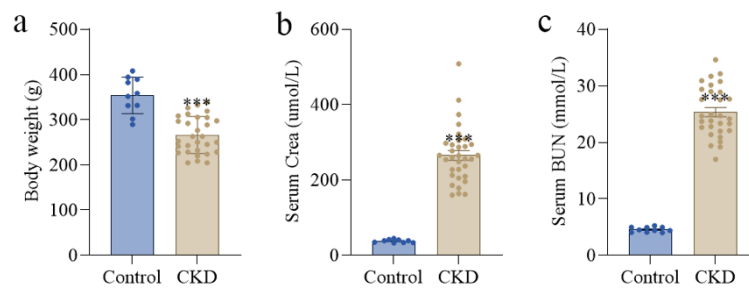

Figure s1. (a) Body weight, (b) Serum Crea and (c) Serum BUN were measured when the modeling of rats was finished. \*\*\* $p < 0.001$  vs the Control group.

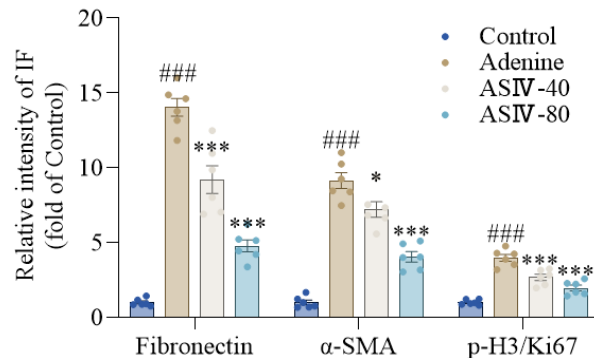

Figure s2. Quantitative analysis of immunofluorescence for Fibronectin,  $\alpha$ -SMA and p-H3/Ki67 in rat kidneys. Mean  $\pm$  SEM. ### $p < 0.001$  vs the Control group, \* $p < 0.05$ , \*\*\* $p < 0.001$  vs the Adenine group.

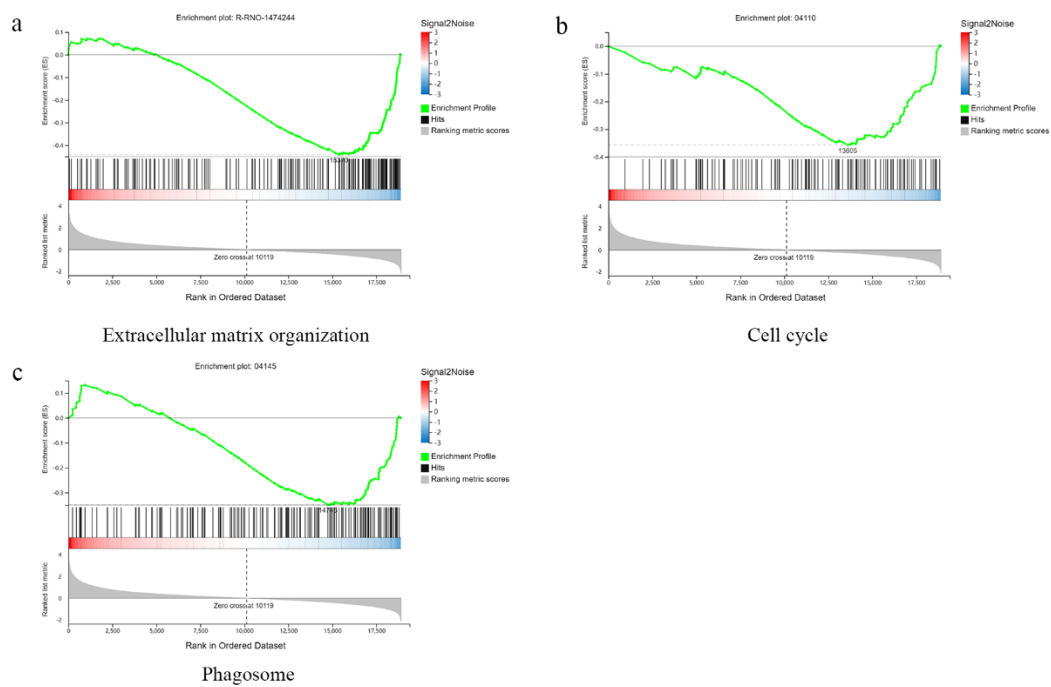

Figure s3. Gene Set Enrichment Analysis (GSEA) for (a) Extracellular matrix organization, (b) Cell cycle and (c) Phagosome in kidney tissues.

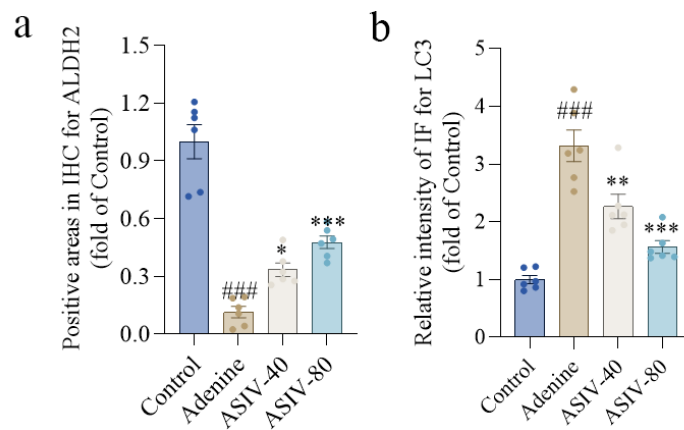

Figure s4. (a) Quantitative analysis of immunohistochemistry staining for ALDH2 in rat kidneys. (b) Quantitative analysis of immunofluorescence staining for LC3 in rat kidneys. Mean  $\pm$  SEM. ### $p < 0.001$  vs the Control group, \* $p < 0.05$ , \*\* $p < 0.01$ , \*\*\* $p < 0.001$  vs the Adenine group.

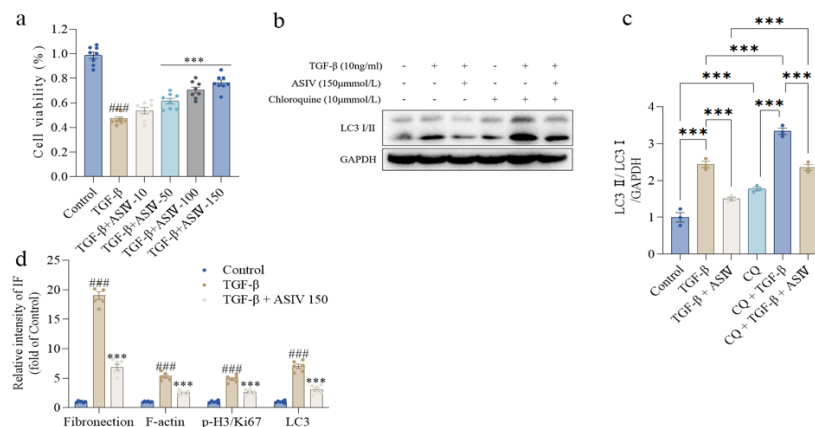

Figure s5. (a) Cell viability were measured under the treatment with TGF- $\beta$ 1 (10 ng/mL) or TGF- $\beta$ 1 (10 ng/mL) plus different concentrations of ASIV (10, 50, 100, 150  $\mu$ M). (b) Protein expression of LC3 I/II in HK-2 cells treated by western blotting. (c) Quantitative analysis of the relative protein expression of LC3 II/LC3 I in the renal tissues. Mean  $\pm$  SEM. \*\*\* $p$  < 0.001. (d) Quantitative analysis of immunofluorescence for Fibronectin, F-actin, p-H3/Ki67 and LC3 in TGF- $\beta$ 1-stimulated HK-2 cells. Mean  $\pm$  SEM. ### $p$  < 0.001 vs the Control group, \*\*\* $p$  < 0.001 the TGF- $\beta$ 1 group.

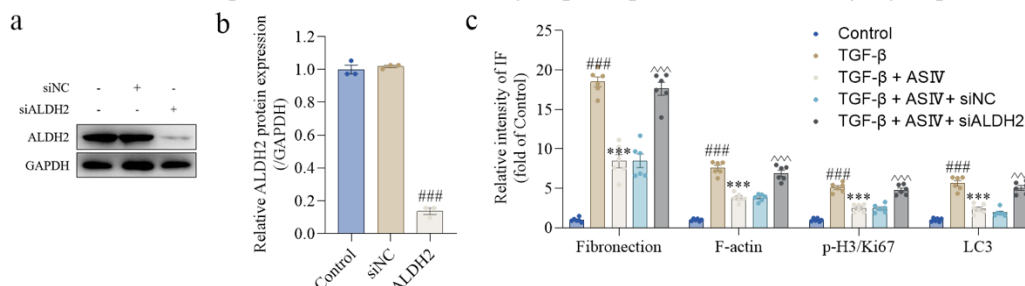

Figure s6. (a) Protein expression of ALDH2 in HK-2 cells treated with siNC or siALDH2 by western blotting. (b) Quantitative analysis of the relative protein expression of ALDH2. (c) Quantitative analysis of immunofluorescence for Fibronectin, F-actin, p-H3/Ki67 and LC3 in TGF- $\beta$ 1-stimulated HK-2 cells. Mean  $\pm$  SEM. ### $p$  < 0.001 vs the Control group, \*\*\* $p$  < 0.001 the TGF- $\beta$ 1 group, ^^ $p$  < 0.001 vs the TGF- $\beta$ 1+ASIV group.

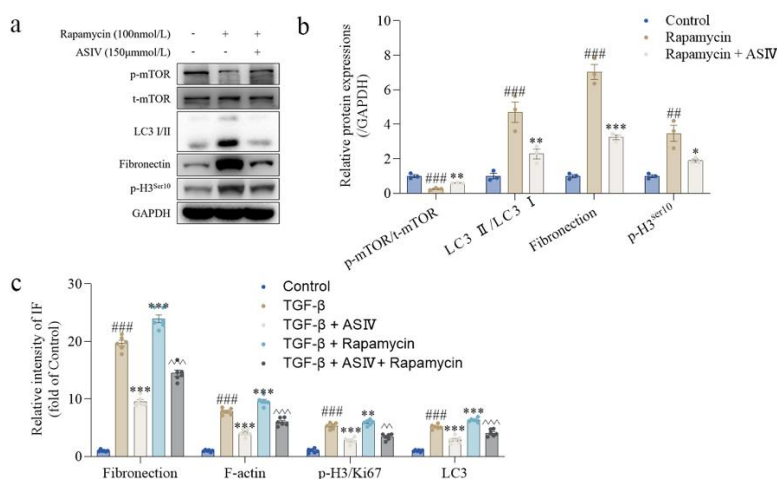

Figure s7. (a) Protein expression of p-mTOR, t-mTOR, LC3 I/II, Fibronectin and p-H3<sup>ser10</sup> in HK-2 cells treated by western blotting. (b) Quantitative analysis of the phosphorylation level of mTOR and the relative protein expressions of p-mTOR, t-mTOR, LC3 I/II, Fibronectin and p-H3<sup>ser10</sup>. Mean  $\pm$  SEM. ### $p$  < 0.001 vs the Control group, \* $p$  < 0.05, \*\* $p$  < 0.01, \*\*\* $p$  < 0.001 vs the Rapamycin group. (c) Quantitative analysis of immunofluorescence for Fibronectin, F-actin, p-H3/Ki67 and LC3 in TGF- $\beta$ 1-stimulated HK-2 cells. Mean  $\pm$  SEM. ### $p$  < 0.001 vs the Control group, \*\* $p$  < 0.01, \*\*\* $p$  < 0.001 vs the TGF- $\beta$ 1 group, ^^ $p$  < 0.01, ^^ $p$  < 0.001 vs the TGF- $\beta$ 1+ASIV group.

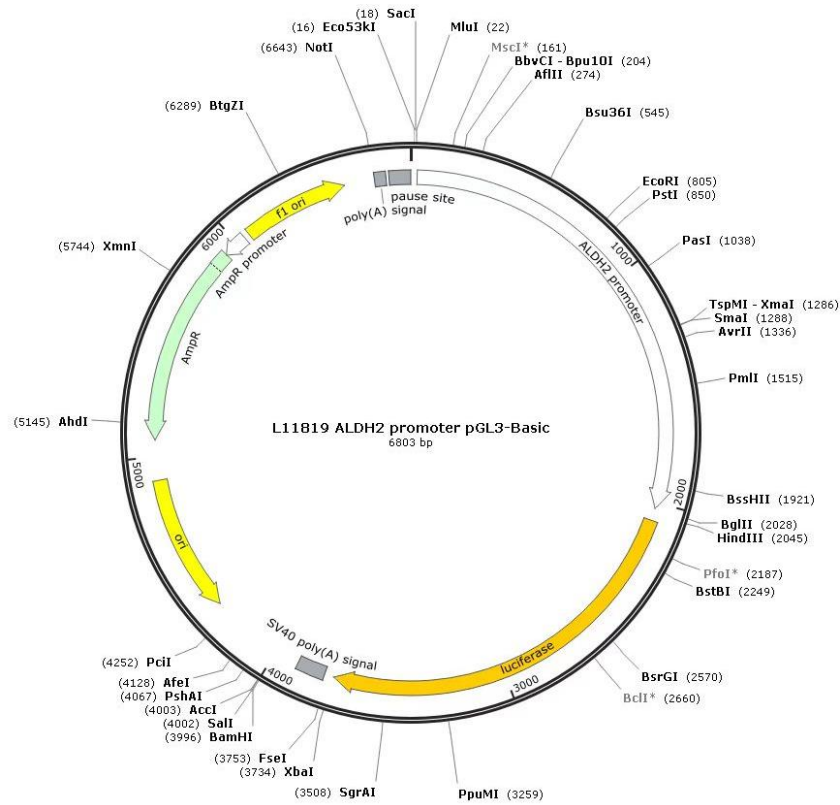

Figure s8. Structure of ALDH2 promoter plasmid.
